# Supplementary material for: Direct observation of atomic step edges on the rutile TiO2(110)-(1 × 1) surface using atomic force microscopy
Source: Royal Society of Chemistry journal article supplement (doi:10.1039/c8cp06156d), 2018-01-01
Supplement: c8cp06156d1.pdf [file c8cp06156d1.pdf]

Supporting information

## Direct observation of atomic step edges on rutile $\text{TiO}_2(110)-(1\times 1)$ surface using atomic force microscopy

Huan Fei Wen, Masato Miyazaki, Quanzhen Zhang, Yuuki Adachi, Yan Jun Li\*, Yasuhiro Sugawara

Department of Applied Physics, Graduate School of Engineering, Osaka University, 2-1 Yamadaoka, Suita, Osaka 565-0871, Japan

E-mail: liyanjun@ap.eng.osaka-u.ac.jp

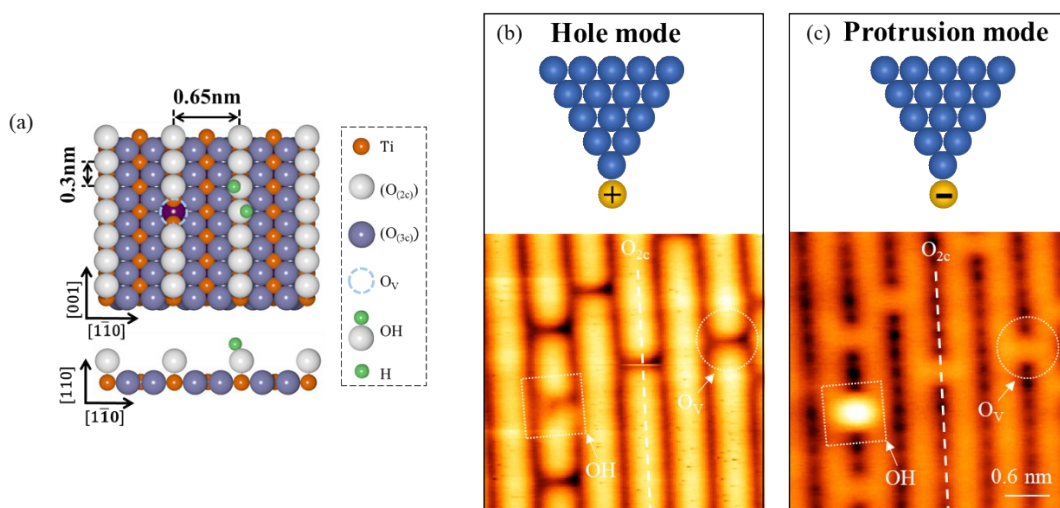

Figure S1. (a) Ball model of rutile  $\text{TiO}_2(110)-(1\times 1)$  surface and AFM images, (b) recorded in hole mode, (c) recorded in protrusion mode at the same area.
